# Supplementary material for: Revealing Natural Relationships among Arbuscular Mycorrhizal Fungi: Culture Line BEG47 Represents Diversispora epigaea, Not Glomus versiforme
Source: PubMed Central journal article supplement (PMC3154914; doi:10.1371/journal.pone.0023333), 2011-08-11
Supplement: pone.0023333.s001.pdf [file pone.0023333.s001.pdf]

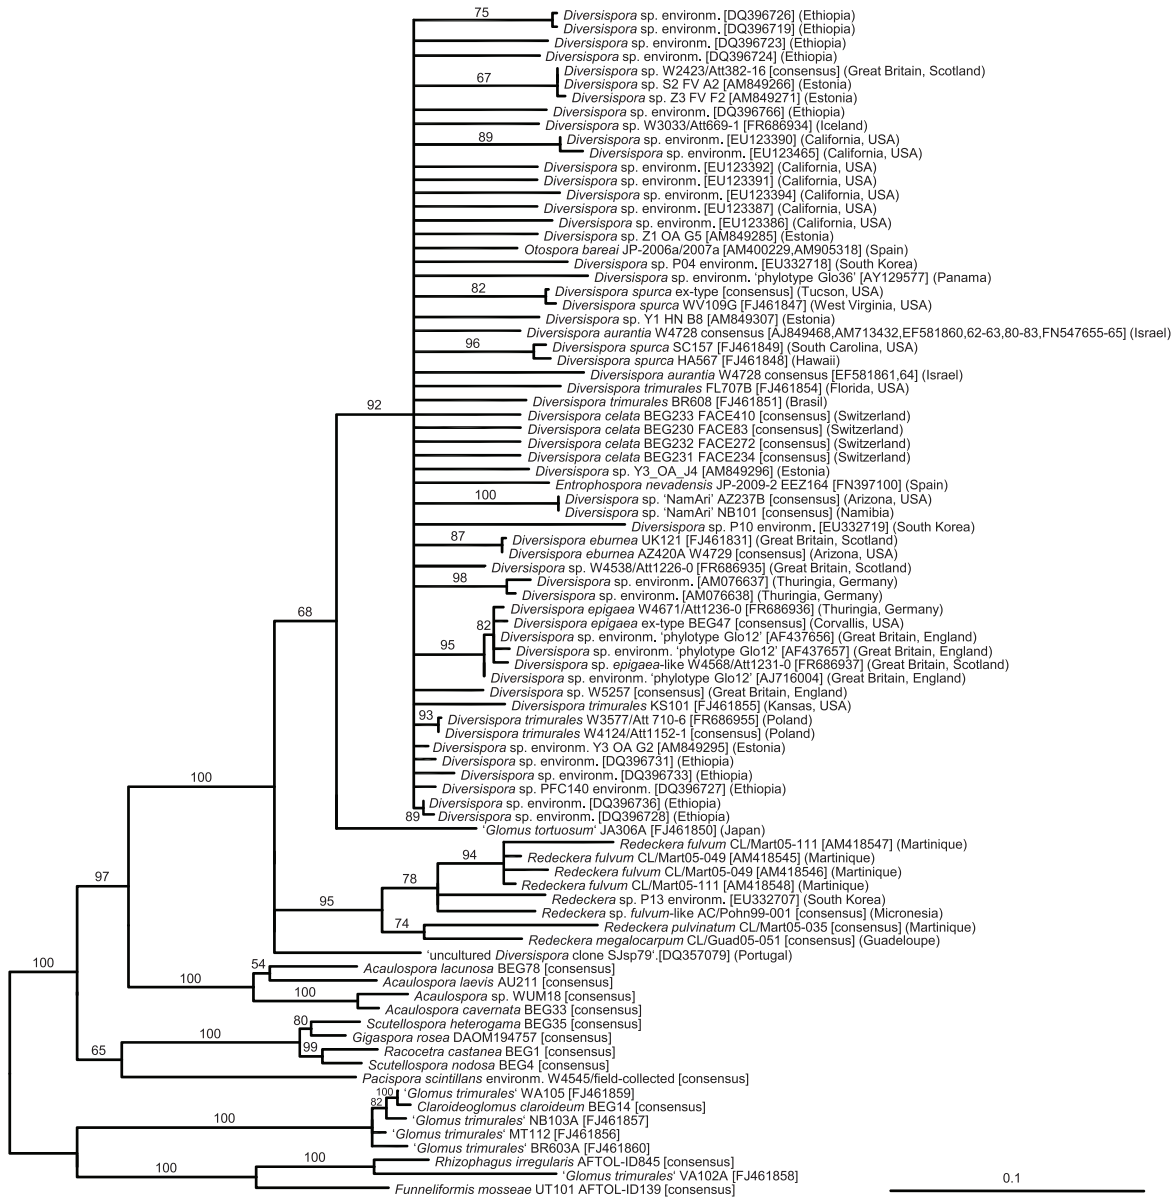

**Figure S1: Phylogenetic tree of *Diversisporaceae* with additional environmental nuclear rDNA sequences.**
