# Supplementary material for: Revealing Natural Relationships among Arbuscular Mycorrhizal Fungi: Culture Line BEG47 Represents Diversispora epigaea, Not Glomus versiforme
Source: PubMed Central journal article supplement (PMC3154914; doi:10.1371/journal.pone.0023333), 2011-08-11
Supplement: pone.0023333.s003.pdf [file pone.0023333.s003.pdf]

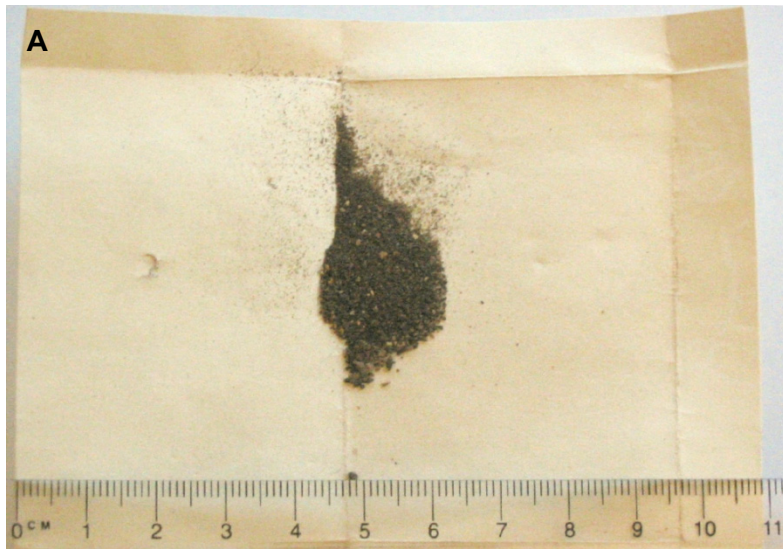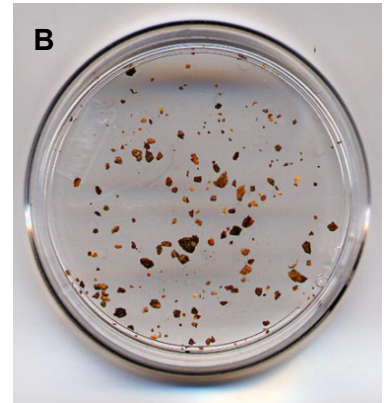

**Figure S3: Type collection of *Endogone versiformis*.** **A.** *Endogone versiformis* (= *Glomus versiforme*) type collection. **B.** Sporocarp fragments from the *Endogone versiformis* type collection in a 5 cm Petri dish.
