# Supplementary material for: Revealing Natural Relationships among Arbuscular Mycorrhizal Fungi: Culture Line BEG47 Represents Diversispora epigaea, Not Glomus versiforme
Source: PubMed Central journal article supplement (PMC3154914; doi:10.1371/journal.pone.0023333), 2011-08-11
Supplement: pone.0023333.s004.pdf [file pone.0023333.s004.pdf]

**Table S1:** List of studied samples of the *Diversispora epigaea* (= *Glomus epigaeum*) ex-type culture-line (corresponding to the culture registered as BEG47) samples studied.

| Voucher (W) | Culturing Attempt (Att)                                                                                                                            | Collection Date                 | Collector   | Locality                                                                                                                           |
|-------------|----------------------------------------------------------------------------------------------------------------------------------------------------|---------------------------------|-------------|------------------------------------------------------------------------------------------------------------------------------------|
| 90          | 475-1. Pot culture with <i>Asparagus officinalis</i> established from a single 'sporocarp' (spore mass) taken from a potted <i>Araucaria</i> plant | 13 December 1977                | B. Daniels  | USA, Oregon, Benton Co., USDA- ARS, Horticultural Crops Research Unit (HCRU), Tropical Greenhouse. HOLOTYPE. Trappe 5174. OSC39475 |
| 100         | 475-1. As above                                                                                                                                    | 12 April 1979                   | B. Daniels  | As above (HCRU)                                                                                                                    |
| 407         | 475-3. No culture data                                                                                                                             | July 1978 (known only to month) | B. Daniels  | As above (HCRU)                                                                                                                    |
| 1518        | 475-7. Pot culture with <i>Sorghum bicolor</i>                                                                                                     | 24 January 1981                 | D. Egel     | USA, Ames, Iowa, Iowa State Univeristy Forestry Greenhouse                                                                         |
| 526         | 475-6. No culture data except 'Menge 0-1'                                                                                                          | 13 January 1982                 | J. Menge    | USA, California, University of California, Riverside                                                                               |
| 1640        | 475-14. Pot culture with <i>Allium porrum</i>                                                                                                      | 2 December 1991                 | C. Grace    | UK, England, Hertfordshire, Harpenden, Rothamsted Experiment Station                                                               |
| 1641        | 475-17. No culture data                                                                                                                            | 1990 (known only to year)       | F. Sanders  | UK, England, Yorkshire, Leeds, University of Leeds, Dept. of Plant Sciences                                                        |
| 1728        | 475-12. No culture data                                                                                                                            | 19 March 1993                   | B. Breuinet | Italy, Torino, University of Torino, Dipartimento di Biologia Vegetale                                                             |
| 2336        | 475-18. Pot culture with <i>Plantago lanceolata</i>                                                                                                | 11 October 1995                 | A. Broome   | UK, Scotland, Midlothian, Roslin, Forest Research, Northern Research Station                                                       |
| 2842        | 475-20. No culture data                                                                                                                            | 1 October 1996                  | P. Bonfante | Italy, Torino, University of Torino, Dipartimento di Biologia Vegetale                                                             |
| 3180        | 475-22. No culture data                                                                                                                            | 15 October 1996                 | P. Bonfante | Italy, Torino, University of Torino, Dipartimento di Biologia Vegetale                                                             |
| 3206        | 475-21. Pot culture with <i>P. lanceolata</i>                                                                                                      | 13 January 1999                 | C. Walker   | UK, England, Hampshire, Efford, Horticultural Research International                                                               |
| 3221        | 475-21. Pot culture with <i>P. lanceolata</i>                                                                                                      | 24 February 1999                | C. Walker   | UK, England, Hampshire, Efford, Horticultural Research International                                                               |
| 3537        | 475-30. Pot culture with <i>P. lanceolata</i>                                                                                                      | 3 November 2000                 | M. Vestberg | Finland, Vihtavuori, Laukaa Research & Elite Plant Laboratory                                                                      |
| 3581        | 475-21. Pot culture with <i>P. lanceolata</i>                                                                                                      | 5 February 2001                 | C. Walker   | UK, England, Hampshire, Efford, Horticultural Research International                                                               |
| 3864        | 475-21. Pot culture with <i>P. lanceolata</i>                                                                                                      | 15 March 2002                   | C. Walker   | UK, England, Hampshire, Efford, Horticultural Research International                                                               |
| 4475        | 475-38. No culture data                                                                                                                            | 12 June 2003                    | B. Blal     | France, Dijon, Biorize                                                                                                             |
| 4560        | 475-39. Pot culture with <i>P. lanceolata</i>                                                                                                      | 9 December 2003                 | C. Walker   | Belgium, Louvain-la-Neuve, Catholic University of Louvain                                                                          |
| 4565        | 475-40. Pot culture with <i>P. lanceolata</i>                                                                                                      | 15 December 2003                | C. Walker   | UK, Scotland, Royal Botanic Garden Edinburgh                                                                                       |
| 5164        | 475-40. Pot culture with <i>P. lanceolata</i>                                                                                                      | 15 April 2006                   | C. Walker   | UK, England, Gloucester (moved from Edinburgh)                                                                                     |
| 5065        | 475-44. Pot culture with <i>P. lanceolata</i>                                                                                                      | 30 January 2007                 | G. Bending  | UK, England, Wellesbourne, University of Warwick                                                                                   |
| 5066        | 475-44. Pot culture with <i>P. lanceolata</i>                                                                                                      | 30 January 2007                 | G. Bending  | UK, England, Wellesbourne, University of Warwick                                                                                   |
| 5117        | 475-45. Pot culture with <i>Trifolium repens</i>                                                                                                   | 08 February 2007                | M. Naumann  | Italy, Torino, University of Torino, Dipartimento di Biologia Vegetale                                                             |
| 5165        | 475-45. Pot culture with <i>T. repens</i>                                                                                                          | 28 April 2007                   | M. Naumann  | Italy, Torino, University of Torino, Dipartimento di Biologia Vegetale                                                             |
| 5167        | 475-45. Pot culture with <i>T. repens</i>                                                                                                          | 28 April 2007                   | M. Naumann  | Italy, Torino, University of Torino, Dipartimento di Biologia Vegetale                                                             |

|      |                                                                                                                    |                   |             |                                                                        |
|------|--------------------------------------------------------------------------------------------------------------------|-------------------|-------------|------------------------------------------------------------------------|
| 5170 | 475-46. Pot culture with <i>P. lanceolata</i>                                                                      | 16 May 2007       | M. Naumann  | Italy, Torino, University of Torino, Dipartimento di Biologia Vegetale |
| 5260 | 475-45. Pot culture with <i>T. repens</i>                                                                          | 1 June 2007       | M. Naumann  | Italy, Torino, University of Torino, Dipartimento di Biologia Vegetale |
| 5358 | 475-45. Pot culture with <i>T. repens</i>                                                                          | 25 July 2007      | M. Naumann  | Italy, Torino, University of Torino, Dipartimento di Biologia Vegetale |
| 5606 | 475-55. No culture data                                                                                            | 1 February 2009   | M. Harrison | USA, New York, Ithaca, Boyce Thompson Institute for Plant Research     |
| 5707 | 475-59. Pot culture with <i>P. lanceolata</i>                                                                      | 25 January 2010   | C. Walker   | UK, England, Wellesbourne, University of Warwick                       |
| 5708 | 475-60. Pot culture with <i>P. lanceolata</i>                                                                      | 25 January 2010   | C. Walker   | UK, England, Wellesbourne, University of Warwick                       |
| 5728 | 475-56. Pot culture with <i>P. lanceolata</i> , <i>Festuca ovina</i> agg., <i>Lotus japonicus</i> var. <i>gifu</i> | 3 March 2010      | A. Schüßler | Germany, Martinsried, Ludwig-Maximilians-University Munich             |
| 5724 | 475-48. Pot culture with <i>P. lanceolata</i>                                                                      | 9 March 2010      | M. Krüger   | Germany, Martinsried, Ludwig-Maximilians-University Munich             |
| 5725 | 475-49. Pot culture with <i>P. lanceolata</i>                                                                      | 9 March 2010      | M. Krüger   | Germany, Martinsried, Ludwig-Maximilians-University Munich             |
| 5726 | 475-57. Pot culture with <i>P. lanceolata</i>                                                                      | 9 March 2010      | M. Krüger   | Germany, Martinsried, Ludwig-Maximilians-University Munich             |
| 5727 | 475-47. Pot culture with <i>P. lanceolata</i>                                                                      | 9 March 2010      | A. Schüßler | Germany, Martinsried, Ludwig-Maximilians-University Munich             |
| 5786 | 475-61. Pot culture with <i>P. lanceolata</i>                                                                      | 24 June 2010      | C. Walker   | UK, England, Gloucester                                                |
| 5835 | 475-61. Pot culture with <i>P. lanceolata</i>                                                                      | 23 September 2010 | C. Walker   | UK, England, Gloucester                                                |
| 5848 | 475-66. Pot culture with <i>P. lanceolata</i>                                                                      | 26 October 2010   | C. Krüger   | Germany, Martinsried, Ludwig-Maximilians-University Munich             |
| 5849 | 475-71. Pot culture with <i>P. lanceolata</i>                                                                      | 26 October 2010   | C. Krüger   | Germany, Martinsried, Ludwig-Maximilians-University Munich             |
