# Supplementary material for: Revealing Natural Relationships among Arbuscular Mycorrhizal Fungi: Culture Line BEG47 Represents Diversispora epigaea, Not Glomus versiforme
Source: PubMed Central journal article supplement (PMC3154914; doi:10.1371/journal.pone.0023333), 2011-08-11
Supplement: pone.0023333.s005.pdf [file pone.0023333.s005.pdf]

**Table S2:** Composition of the strict consensus sequences used in the phylogenetic analyses.

|                                                                                                                                                              |                                                                                                                                                                                                                                                                                                                                                                                                                                                                               |
|--------------------------------------------------------------------------------------------------------------------------------------------------------------|-------------------------------------------------------------------------------------------------------------------------------------------------------------------------------------------------------------------------------------------------------------------------------------------------------------------------------------------------------------------------------------------------------------------------------------------------------------------------------|
| <b><i>Diversispora aurantia</i></b>                                                                                                                          | AJ849468 (type culture); FN547655-65, AM713432, EF581860,62,63,80-83 (W4728/Att1296-0 (ex-type soil trap culture))                                                                                                                                                                                                                                                                                                                                                            |
| <b><i>Diversispora celata</i></b>                                                                                                                            | AM713423-25, AY639225-32, EF581865-68 (W4758/Att1292-2, BEG230 = FACE83); AM713426-28, AY639236-41, EF581873-76 (W4757/Att1291-2, BEG232 = FACE272); DQ350448-53 (W5306-07/Att1500-2 = BEG233 = FACE410); AM713417-22, AM713402-04, AY639233-35, AY639306, EF581869-72 (ex-type single spore culture W4718-19/Att1278-2, BEG231 = FACE234)                                                                                                                                    |
| <b><i>Diversispora eburnea</i></b>                                                                                                                           | AM713405-16,29-31, EF067886-88, EF581877-79 (AZ420A W4729/Att1290-5, ex-type culture)                                                                                                                                                                                                                                                                                                                                                                                         |
| <b><i>Diversispora epigaea</i></b><br>(all ex-type culture-lineage, originally from Oregon State University, USA, all in the same culture-lineage as BEG47): | AJ132666 (BEG47 from BEG at INRA Dijon, France); AJ276088 (W3221/Att475-21 from C. Walker, Hampshire, England); AM947665, AY842567-69,73,74, FJ461852, FM876814-20, FN547635,36, (W5165/Att475-45 from P. Bonfante, Torino via C. Walker, UK via B. Blal, Dijon, France via INRA, Dijon, France via Rothamsted Experimental Station, UK); FN547666-81 (W3180/Att475-22); X86687, Y17651, FR686938-42 (HC/F-E01 from P. Bonfante, Torino, Italy via J. Trappe, Corvallis, USA) |
| <b><i>Diversispora</i> sp. W2423</b>                                                                                                                         | AJ301863, AJ276076, Y17644, AJ301860, FR686943-44 (W2423/Att382-16)                                                                                                                                                                                                                                                                                                                                                                                                           |
| <b><i>Diversispora</i> sp. 'NamAri'</b>                                                                                                                      | AF185677-81 (in sequence database as <i>Glomus</i> sp. AZ237B; in INVAM culture collection as <i>Glomus intraradices</i> AZ237B); AF185682,90,91, AF185693-95 (in sequence database as <i>Glomus</i> sp. NB101; in INVAM culture collection as <i>Glomus intraradices</i> NB101)                                                                                                                                                                                              |
| <b><i>Diversispora</i> sp. W5257</b>                                                                                                                         | FR686945-52, FR686958 (W5257)                                                                                                                                                                                                                                                                                                                                                                                                                                                 |
| <b><i>Diversispora spurca</i></b><br>(all ex-type cultures)                                                                                                  | AJ276077 (W3239/Att246-4); AJ276078, Y17649,50, FR686953 (W2396/Att246-4); FN547637-54, FR686954 (W4119/Att246-18)                                                                                                                                                                                                                                                                                                                                                            |
| <b><i>Diversispora trimurales</i></b>                                                                                                                        | FR686956-57 (W4124/Att1152-1)                                                                                                                                                                                                                                                                                                                                                                                                                                                 |
| <b><i>Redeckera fulva</i></b>                                                                                                                                | AM418543-44 (AC/Pohn99-001)                                                                                                                                                                                                                                                                                                                                                                                                                                                   |
| <b><i>Redeckera megalocarpa</i></b><br>(from type material)                                                                                                  | AM418551,52 (CL/Guad05-051)                                                                                                                                                                                                                                                                                                                                                                                                                                                   |
| <b><i>Redeckera pulvinata</i></b>                                                                                                                            | AM418549,50 (CL/Mart05-035)                                                                                                                                                                                                                                                                                                                                                                                                                                                   |
| <b><i>Otospora bareai</i></b><br>(thought to be from the type material)                                                                                      | AM400229, AM905318 (assembly of non-overlapping 5' and 3' regions of SSU rRNA gene)                                                                                                                                                                                                                                                                                                                                                                                           |
| <b><i>Acaulospora lacunosa</i> BEG78</b>                                                                                                                     | FR719957, AJ891110-13, AJ510230                                                                                                                                                                                                                                                                                                                                                                                                                                               |
| <b><i>Acaulospora laevis</i> AU211</b>                                                                                                                       | AJ250847, AJ242499, FJ461802                                                                                                                                                                                                                                                                                                                                                                                                                                                  |
| <b><i>Acaulospora cavernata</i> BEG33</b><br>(given as <i>A. scrobiculata</i> at BEG)                                                                        | AJ306442, FM876788-91                                                                                                                                                                                                                                                                                                                                                                                                                                                         |
| <b><i>Acaulospora</i> sp. WUM18</b><br>(equivalent to INVAM AU103A)                                                                                          | AJ306441, FM876792,93                                                                                                                                                                                                                                                                                                                                                                                                                                                         |
| <b><i>Claroideoglomus claroideum</i> BEG14</b><br>(= <i>Glomus claroideum</i> )                                                                              | AJ301851,52, AJ276075, Y17636, AF235007                                                                                                                                                                                                                                                                                                                                                                                                                                       |
| <b><i>Rhizophagus irregularis</i></b><br>GINCO4695rac-11G2 (AFTOL-ID845)<br>(= <i>Glomus irregulare</i> )                                                    | DQ322630, AY997054, DQ273828                                                                                                                                                                                                                                                                                                                                                                                                                                                  |
| <b><i>Funneliformis mosseae</i> UT101</b><br>(AFTOL-ID139) (= <i>Glomus mosseae</i> )                                                                        | AY635833, AY997053, DQ273793                                                                                                                                                                                                                                                                                                                                                                                                                                                  |
| <b><i>Gigaspora rosea</i> DAOM194757</b>                                                                                                                     | X58726, AJ410746,47, FN547571-97                                                                                                                                                                                                                                                                                                                                                                                                                                              |
| <b><i>Pacispora scintillans</i> W4545</b><br>(vouchD1, sample3)                                                                                              | FM876831,32, AJ619952-55                                                                                                                                                                                                                                                                                                                                                                                                                                                      |
| <b><i>Racocetra castanea</i> BEG1</b><br>(ex-type culture)                                                                                                   | AF038590, AJ002874, AJ313169-75, FJ461867, FN423706,07, U31997,98, Y12076                                                                                                                                                                                                                                                                                                                                                                                                     |
| <b><i>Scutellospora heterogama</i> BEG35</b>                                                                                                                 | AJ306434, FM876837-39                                                                                                                                                                                                                                                                                                                                                                                                                                                         |
| <b><i>Scutellospora nodosa</i> BEG4</b>                                                                                                                      | FM876833-36, AJ306436                                                                                                                                                                                                                                                                                                                                                                                                                                                         |
